# Supplementary material
Source: PubMed Central journal article supplement (PMC5910032)
Supplement: NIHMS958000-supplement-supplement_1.pdf [file NIHMS958000-supplement-supplement_1.pdf]

## **AUTHOR INFORMATION**

Corresponding Authors' email:

John.Karanicolas@fccc.edu , Andrew.Zhang@astrazeneca.com

Notes:

C.E.K, M.P.C, and A.X.Z are current employees at AstraZeneca.

S.K. is a current employee at Fulcrum Therapeutics.

## **SUPPORTING INFORMATION**

Table S1, Observed melting temperatures from differential scanning fluorimetry (DSF) experiments;

Figure S1, Indole rescues FITC-E2 V<sub>H</sub> W118G activity;

Figure S2, Validation of SPR ISA setup;

Figure S3, Differential scanning fluorimetry (DSF) thermal unfolding transitions.

**SUPPLEMENTARY TABLE**

| <b>Sample</b>        | <b>Condition</b>         | <b>T<sub>m</sub> (°C)</b> | <b>S.E.M. (°C)</b> |
|----------------------|--------------------------|---------------------------|--------------------|
| WT                   | Apo                      | 64.1                      | 0.06               |
|                      | 1000X indole             | 63.5                      | 0.06               |
|                      | 1:1 Fluor                | 69.9                      | 0.05               |
|                      | 1:1 Fluor + 1000X indole | 69.3                      | 0.10               |
| V <sub>H</sub> W118G | Apo                      | 48.9                      | 0.26               |
|                      | 1000X indole             | 47.0                      | 0.15               |
|                      | 1:1 Fluor                | 52.4                      | 0.21               |
|                      | 1:1 Fluor + 1000X indole | 53.7                      | 0.06               |
| V <sub>H</sub> W52G  | Apo                      | 53.5                      | 0.07               |
|                      | 1000X indole             | 52.6                      | 0.01               |
|                      | 1:1 Fluor                | 53.7                      | 0.07               |
|                      | 1:1 Fluor + 1000X indole | 52.9                      | 0.07               |
| V <sub>L</sub> W107G | Apo                      | 59.9                      | 0.07               |
|                      | 1000X indole             | 59.2                      | 0.01               |
|                      | 1:1 Fluor                | 59.9                      | 0.13               |
|                      | 1:1 Fluor + 1000X indole | 59.3                      | 0.07               |

**Table S1: Observed melting temperatures from differential scanning fluorimetry (DSF) experiments.** Values were obtained by fitting to the data presented in Figure S3. All data were collected in triplicate, experimental uncertainty corresponds to standard error of the mean.

## SUPPLEMENTARY FIGURES

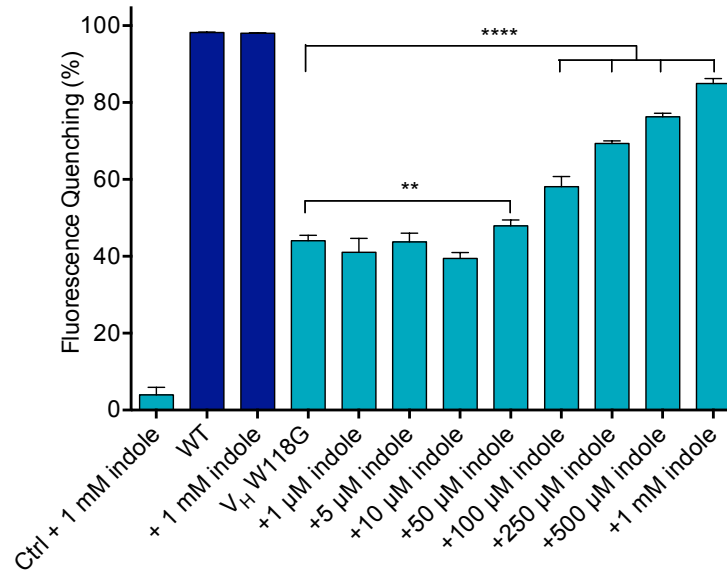

**Figure S1: Indole rescues FITC-E2 V<sub>H</sub> W118G activity.** Addition of indole rescues antigen-binding of FITC-E2 V<sub>H</sub> W118G in a dose-dependent manner. Data are presented as mean  $\pm$  SEM; \*\* $p < 0.01$ , \*\*\*\* $p < 0.0001$  for V<sub>H</sub> W118G with indole versus no indole;  $n = 4$ .

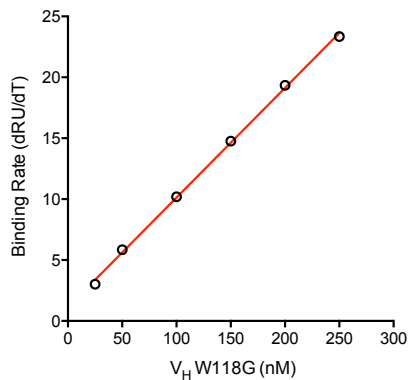

**Figure S2: Validation of SPR ISA setup.** This plot shows the concentration dependence between the initial binding rate  $d(RU)/dT$  and the protein concentration: this confirms that our experimental setup indeed reports on diffusion limited conditions (and not on interaction kinetics).

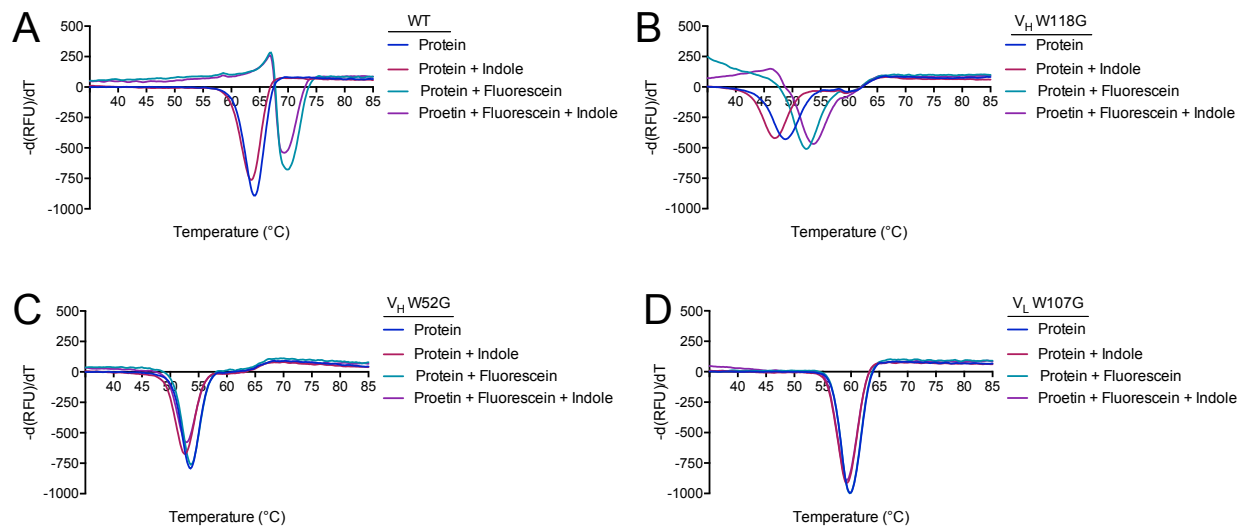

**Figure S3: Differential scanning fluorimetry (DSF) thermal unfolding transitions.** Samples include 5  $\mu$ M protein (*blue*); 5  $\mu$ M protein + 5 mM indole (*magenta*); 5  $\mu$ M protein + 5  $\mu$ M fluorescein (*teal*); and 5  $\mu$ M protein + 5  $\mu$ M fluorescein + 5 mM indole (*purple*). **(A)** Wild-type FITC-E2 **(B)** V<sub>H</sub> W118G **(C)** V<sub>H</sub> W52G **(D)** V<sub>L</sub> W107G.
